# Supplementary material for: Influence of co-cultures ofStreptococcus thermophilus and probiotic lactobacilli on quality and antioxidant capacity parameters of lactose-free fermented dairy beverages containingSyzygium cumini(L.) Skeels pulp
Source: Royal Society of Chemistry journal article supplement (doi:10.1039/c9ra08311a), 2020-01-01
Supplement: c9ra08311a1.pdf [file c9ra08311a1.pdf]

**Supplementary material**

**Table S1.** Statistical analysis (mean±standard deviation) for the pH and titratable acidity of formulations during the fermentation process.

| Time (h) | T1                                      |                          | T2                                      |                          | T3                                      |                         |
|----------|-----------------------------------------|--------------------------|-----------------------------------------|--------------------------|-----------------------------------------|-------------------------|
|          | Lactic acid<br>(g 100 g <sup>-1</sup> ) | pH                       | Lactic acid<br>(g 100 g <sup>-1</sup> ) | pH                       | Lactic acid<br>(g 100 g <sup>-1</sup> ) | pH                      |
| 0        | 0.2 ± 0.0 <sup>Aa</sup>                 | 6.3 ± 0.1 <sup>Agh</sup> | 0.2 ± 0.0 <sup>Ba</sup>                 | 6.3 ± 0.0 <sup>Ai</sup>  | 0.3 ± 0.0 <sup>Ba</sup>                 | 6.3 ± 0.0 <sup>Ah</sup> |
| 1        | 0.3 ± 0.1 <sup>Abc</sup>                | 6.2 ± 0.0 <sup>Ah</sup>  | 0.3 ± 0.0 <sup>Ab</sup>                 | 6.2 ± 0.1 <sup>Ah</sup>  | 0.3 ± 0.0 <sup>Ab</sup>                 | 6.3 ± 0.0 <sup>Bg</sup> |
| 2        | 0.3 ± 0.1 <sup>Ac</sup>                 | 6.2 ± 0.0 <sup>Bg</sup>  | 0.3 ± 0.0 <sup>Ab</sup>                 | 6.1 ± 0.1 <sup>ABg</sup> | 0.3 ± 0.0 <sup>Ac</sup>                 | 6.1 ± 0.0 <sup>Af</sup> |
| 3        | 0.4 ± 0.1 <sup>AcD</sup>                | 6.2 ± 0.0 <sup>Bf</sup>  | 0.3 ± 0.0 <sup>Ac</sup>                 | 6.1 ± 0.1 <sup>ABf</sup> | 0.3 ± 0.0 <sup>Ad</sup>                 | 6.0 ± 0.1 <sup>Af</sup> |
| 4        | 0.4 ± 0.1 <sup>Ab</sup>                 | 6.1 ± 0.1 <sup>Be</sup>  | 0.3 ± 0.1 <sup>Ad</sup>                 | 5.9 ± 0.2 <sup>ABe</sup> | 0.4 ± 0.0 <sup>Ae</sup>                 | 6.0 ± 0.0 <sup>Ae</sup> |
| 5        | 0.4 ± 0.1 <sup>Ab</sup>                 | 5.8 ± 0.2 <sup>Ad</sup>  | 0.3 ± 0.1 <sup>Ae</sup>                 | 5.7 ± 0.3 <sup>Ad</sup>  | 0.4 ± 0.0 <sup>Af</sup>                 | 5.8 ± 0.0 <sup>Ad</sup> |
| 6        | 0.5 ± 0.1 <sup>Abd</sup>                | 5.3 ± 0.6 <sup>Ac</sup>  | 0.4 ± 0.1 <sup>Ae</sup>                 | 5.3 ± 0.6 <sup>Ac</sup>  | 0.5 ± 0.0 <sup>Ag</sup>                 | 5.0 ± 0.0 <sup>Ac</sup> |

T1 = dairy beverage control, without lactobacilli adjunct; T2 = dairy beverage with *L. rhamnosus* LR32; T3 = dairy beverage with *L. casei* BGP93. <sup>A, B</sup> = In a row, different superscript uppercase letters denote significant differences between trials for the same fermentation time (p < 0.05). <sup>a, b, c, d, e, f, g</sup> = In a column, different superscript lowercase letters denote significant differences between the fermentation time for the same trial in a same parameter (p < 0.05).
